# Supplementary material for: DSP-Related Cardiomyopathy as a Distinct Clinical Entity? Emerging Evidence from an Italian Cohort
Source: MDPI journal article supplement (doi:10.3390/ijms24032490), 2023-01-27
Supplement: s1 [file s1]

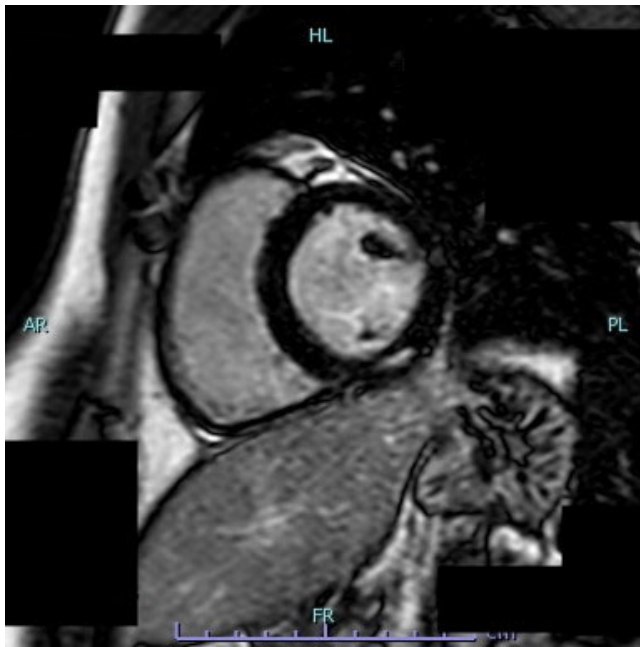

**Supplementary Figure S1A:** Cardiac magnetic resonance imaging of Patient ID 7. Short- axis view. PSIR images shows the presence of subepicardial and midwall LGE in the inferior septum, inferior and posterior wall.

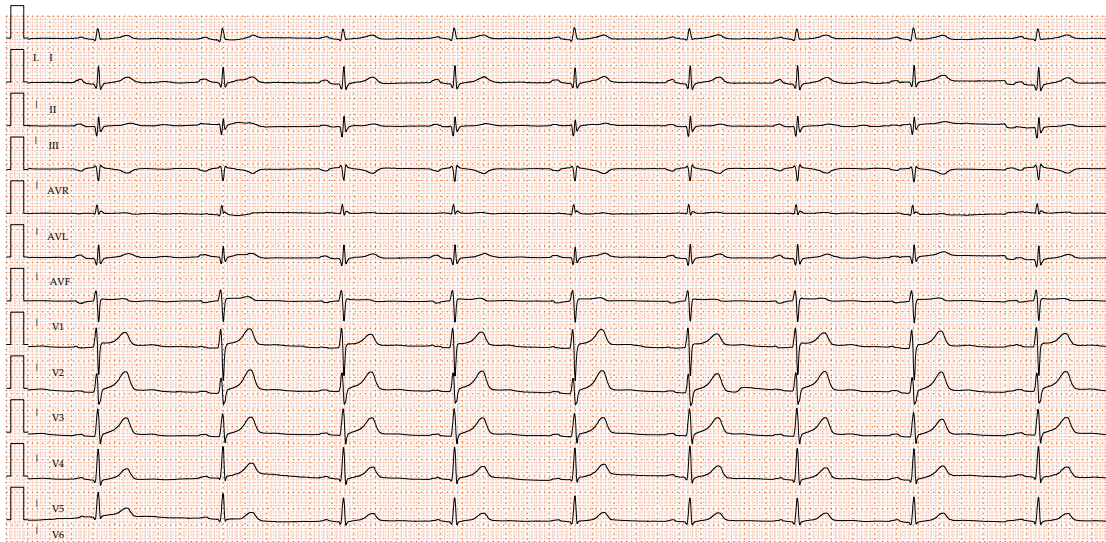

**Supplementary Figure S1B:** 12-ECG leads of Patient ID 7 shows the presence of pathological Q wave in inferior leads, epsilon-like wave in AVL and low QRS voltages in limb leads.

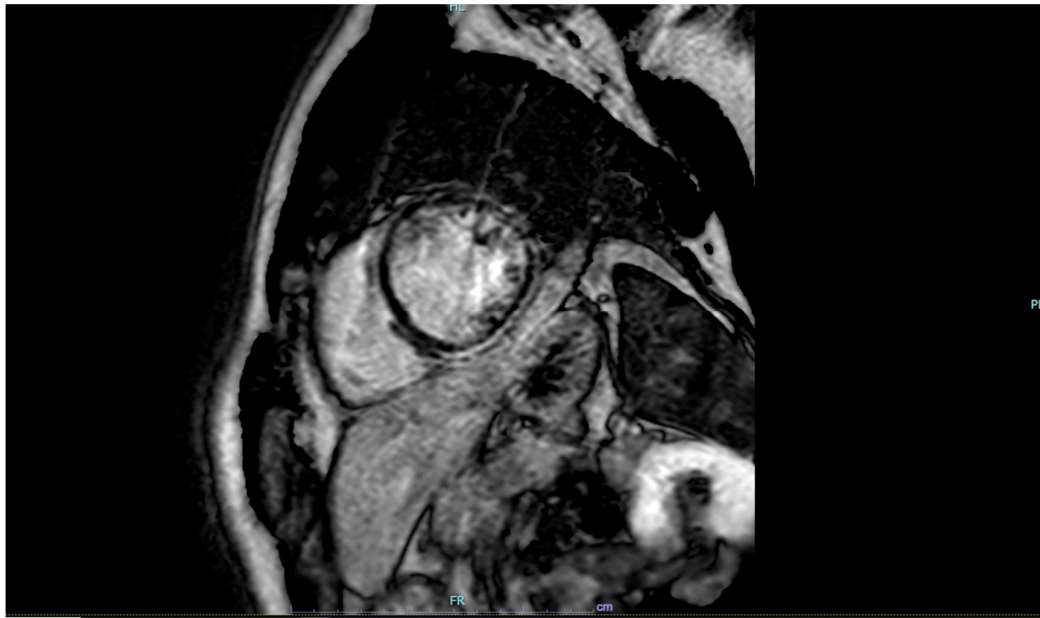

**Supplementary Figure S2A:** Cardiac magnetic resonance imaging of Patient ID 8. Short- axis view. Ring like pattern LGE involves inferior septum, inferior, posterior and lateral wall.

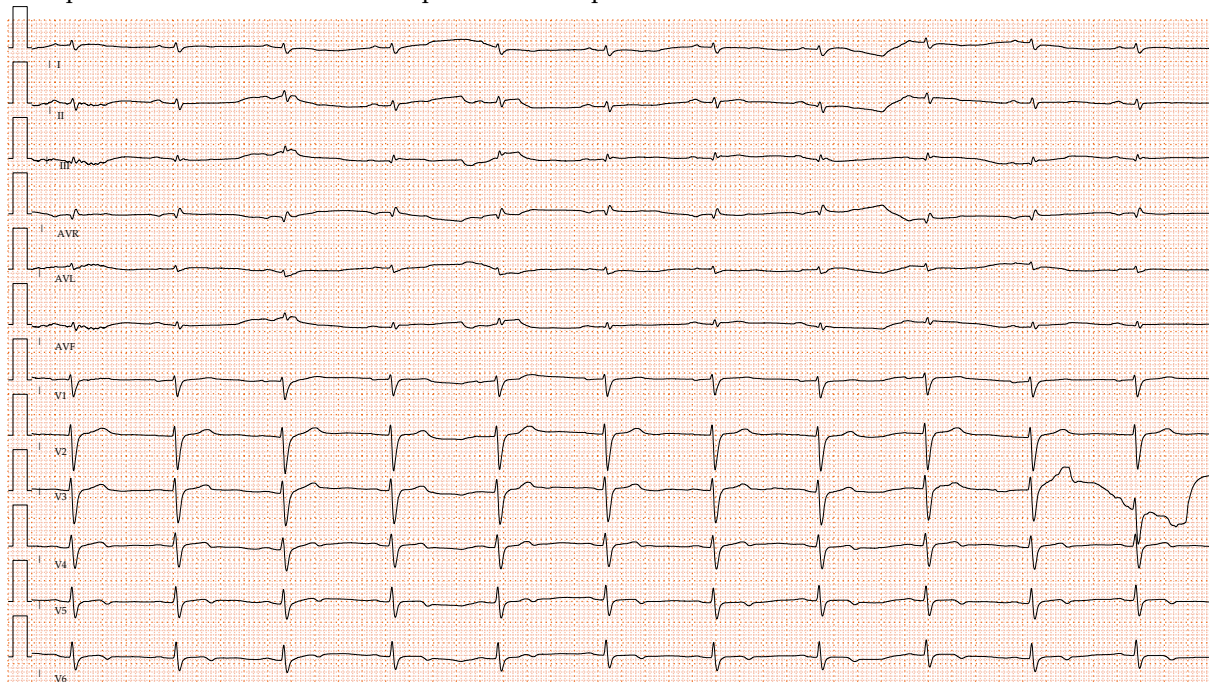

**Supplementary Figure S2B:** 12-ECG leads of Patient ID 8 shows the presence of low QRS voltages in limb leads and T waves inversion in V5-V6.

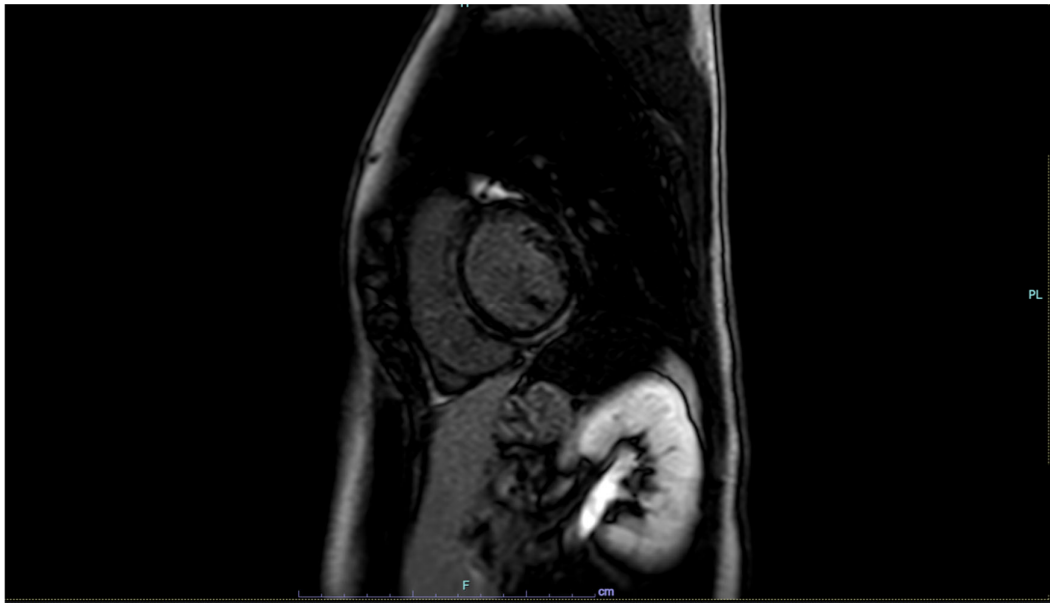

**Supplementary Figure S3A:** Cardiac magnetic resonance imaging of Patient ID 9. Short- axis view. PSIR images shows ring like LGE pattern involving anterior, septal and inferior wall.

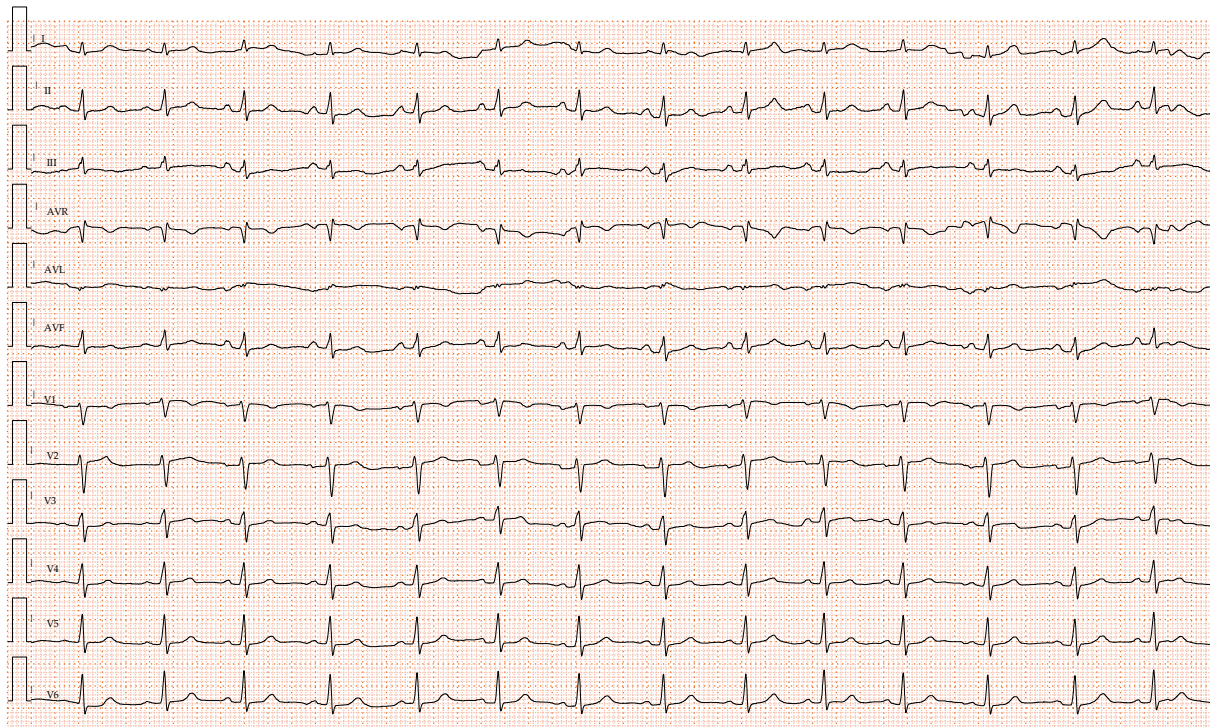

**Supplementary Figure S3B:** 12-ECG leads of Patient ID 9 shows low QRS voltages ( $<0.5$  mV, peak to peak) in DI, aVL in absence of other repolarization and depolarization ECG abnormalities.



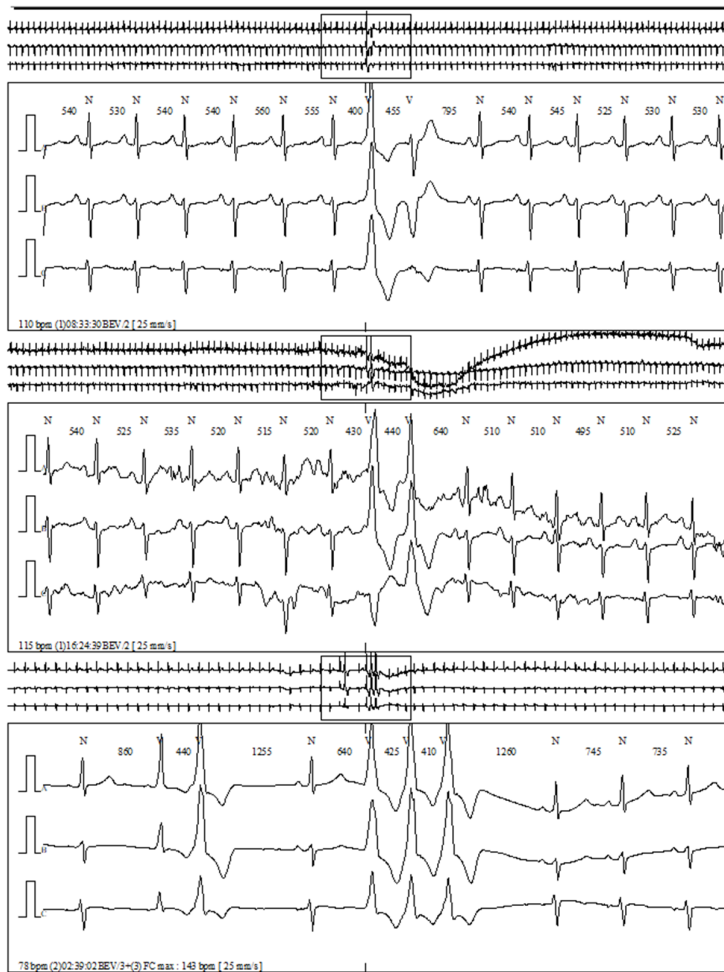

**Supplementary Figure S3C:** premature ventricular beats in couplets and monomorphic triplets in 24 hours ECG monitoring of Patient ID 9.

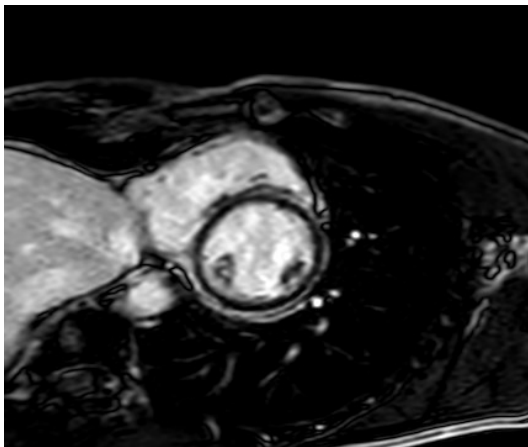

**Supplementary Figure S4:** Cardiac magnetic resonance imaging of Patient ID 10: Short-axis view. PSIR images shows LV subepicardial ring like LGE pattern.

**Table S1:** Genes included in NGS target panel

| Gene            | RefSeq       |
|-----------------|--------------|
| <i>ACTC1</i>    | NM_005159    |
| <i>CACNA1C</i>  | NM_001129841 |
| <i>CACNA2D1</i> | NM_000722    |
| <i>CACNB2</i>   | NM_201596    |
| <i>CAV3</i>     | NM_001234    |
| <i>DSC2</i>     | NM_024422    |
| <i>DSG2</i>     | NM_001943    |
| <i>DSP</i>      | NM_004415    |
| <i>FLNC</i>     | NM_001458    |
| <i>GLA</i>      | NM_000169    |
| <i>JUP</i>      | NM_002230    |
| <i>KCNH2</i>    | NM_000238    |
| <i>KCNQ1</i>    | NM_000218    |
| <i>LAMP2</i>    | NM_013995    |
| <i>LDB3</i>     | NM_001171610 |
| <i>LMNA</i>     | NM_170707    |
| <i>MYBPC3</i>   | NM_000256    |
| <i>MYH7</i>     | NM_000257    |
| <i>MYL2</i>     | NM_000432    |
| <i>MYL3</i>     | NM_000258    |
| <i>PKP2</i>     | NM_004572    |
| <i>PLN</i>      | NM_002667    |
| <i>PRKAG2</i>   | NM_016203    |
| <i>RBM20</i>    | NM_001134363 |
| <i>RYR2</i>     | NM_001035    |
| <i>SCN5A</i>    | NM_00109940  |
| <i>TNNC1</i>    | NM_003280    |
| <i>TNNI3</i>    | NM_000363    |
| <i>TNNT2</i>    | NM_001276347 |
| <i>TPM1</i>     | NM_001018006 |
| <i>TTN</i>      | NM_001267550 |
| <i>TTR</i>      | NM_000371    |

**Table S2:** Oligonucleotide sequences used for Sanger sequencing

| <b>HGVSc</b>      | <b>Exon</b> | <b>Primers</b>                                                          |
|-------------------|-------------|-------------------------------------------------------------------------|
| c.6154C>T         | 24          | <b>Fw:</b> TGACACCTCCAAGCTG<br><b>Rv:</b> AAGGACATGCTTCTCTTC            |
| c.2497C>T         | 18          | <b>Fw:</b> GGAACAAATACTGGGAAATGC<br><b>Rv:</b> TTCTTCAGTGGTTCCCTTCAA    |
| c.2848del         | 20          | <b>Fw:</b> GGATAGGCCCCAGAAAACAGG<br><b>Rv:</b> GCACCTACCACCAGTCAAAG     |
| c. 1352G>C        | 11          | <b>Fw:</b> CTGCATAGCTTCTGGAGAGTG<br><b>Rv:</b> TCAAAGACATTGACTGTGGTGAT  |
| c.5851C>T         | 24          | <b>Fw:</b> GCTCACAGTGTATCCAGGGA<br><b>Rv:</b> TGTCGACAGTCAGCTTCTCA      |
| c.3203_3204del    | 23          | <b>Fw:</b> ATATGAGCAGCTGGTGCAA<br><b>Rv:</b> TCTCCTTGATGGCTTTCTC        |
| c.5210del         | 23          | <b>Fw:</b> AGCCATCAAAATCACCAACC<br><b>Rv:</b> TTTGAGAAACAGTGAAGCTGT     |
| c.170+2T>G        | -           | <b>Fw:</b> GGTAGCGAGCAGCGACCTC<br><b>Rv:</b> GCGGGAGGGGAGAAAGGTA        |
| c.3206_3207del    | 23          | <b>Fw:</b> ATATGAGCAGCTGGTGCAA<br><b>Rv:</b> TCTCCTTGATGGCTTTCTC        |
| c.2506C>T         | 18          | <b>Fw:</b> GGAACAAATACTGGGAAATGC<br><b>Rv:</b> TTCTTCAGTGGTTCCCTTCAA    |
| c.879_890dup      | 7           | <b>Fw:</b> GCCTTTGAACCTCCTGTGCA<br><b>Rv:</b> GAGGGCAACAACACACACTG      |
| c.3724_3739del    | 23          | <b>Fw:</b> AGGAGAACCTTGGTTGGCAG<br><b>Rv:</b> CTGAATGGTCTTGGCAGCCT      |
| c.5601G>A         | 24          | <b>Fw:</b> GCTCACAGTGTATCCAGGGA<br><b>Rv:</b> TGTCGACAGTCAGCTTCTCA      |
| c.1067C>A         | 9           | <b>Fw:</b> GGTGAGAAATTCTCTTTCCAAC<br><b>Rv:</b> TCAGTGCTTTATAAAACACACTC |
| c.3932_3936del    | 23          | <b>Fw:</b> AGGAGAACCTTGGTTGGCAG<br><b>Rv:</b> CTGAATGGTCTTGGCAGCCT      |
| c.816_817delinsAT | 7           | <b>Fw:</b> GCCTTTGAACCTCCTGTGCA<br><b>Rv:</b> GAGGGCAACAACACACACTG      |
